# Supplementary material
Source: Springer Nature journal article supplement (https://www.springermedizin.de/resource/supplementary/12906_2012_1178_MOESM3_ESM.pdf/9520072)

Phenolic composition

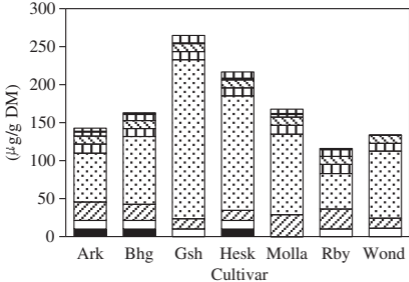

- Del-diglucc
- Cya-diglucc
- Catechin
- Elagic
- Gallic
- Epicatechin
- Rutin

Supplement: MOESM3 [file 9520072]
